# The Mitochondrial $\text{Ca}^{2+}$ Uniporter MCU Is Essential for Glucose-Induced ATP Increases in Pancreatic $\beta$ -Cells

Andrei I. Tarasov<sup>1</sup>, Francesca Semplici<sup>1</sup>, Magalie A. Ravier<sup>1,2</sup>, Elisa A. Bellomo<sup>1</sup>, Timothy J. Pullen<sup>1</sup>, Patrick Gilon<sup>3</sup>, Israel Sekler<sup>4</sup>, Rosario Rizzuto<sup>5</sup>, Guy A. Rutter<sup>1\*</sup>

**1** Section of Cell Biology, Division of Diabetes Endocrinology and Metabolism, Department of Medicine, Imperial College London, London, United Kingdom, **2** Institut de Génomique Fonctionnelle, INSERM U661, CNRS UMR5203, Université Montpellier I et II, Montpellier, France, **3** Pole of Endocrinology, Diabetes and Nutrition, Faculty of Medicine, Université Catholique de Louvain, Brussels, Belgium, **4** Department of Physiology, Faculty of Health Sciences, Ben Gurion University, Beer-Sheva, Israel, **5** Department of Biomedical Sciences, University of Padua, Padua, Italy

## Abstract

Glucose induces insulin release from pancreatic  $\beta$ -cells by stimulating ATP synthesis, membrane depolarisation and  $\text{Ca}^{2+}$  influx. As well as activating ATP-consuming processes, cytosolic  $\text{Ca}^{2+}$  increases may also potentiate mitochondrial ATP synthesis. Until recently, the ability to study the role of mitochondrial  $\text{Ca}^{2+}$  transport in glucose-stimulated insulin secretion has been hindered by the absence of suitable approaches either to suppress  $\text{Ca}^{2+}$  uptake into these organelles, or to examine the impact on  $\beta$ -cell excitability. Here, we have combined patch-clamp electrophysiology with simultaneous real-time imaging of compartmentalised changes in  $\text{Ca}^{2+}$  and ATP/ADP ratio in single primary mouse  $\beta$ -cells, using recombinant targeted (*Pericam* or *Perceval*, respectively) as well as entrapped intracellular (Fura-Red), probes. Through shRNA-mediated silencing we show that the recently-identified mitochondrial  $\text{Ca}^{2+}$  uniporter, MCU, is required for depolarisation-induced mitochondrial  $\text{Ca}^{2+}$  increases, and for a sustained increase in cytosolic ATP/ADP ratio. By contrast, silencing of the mitochondrial  $\text{Na}^+$ - $\text{Ca}^{2+}$  exchanger NCLX affected the kinetics of glucose-induced changes in, but not steady state values of, cytosolic ATP/ADP. Exposure to gluco-lipotoxic conditions delayed both mitochondrial  $\text{Ca}^{2+}$  uptake and cytosolic ATP/ADP ratio increases without affecting the expression of either gene. Mitochondrial  $\text{Ca}^{2+}$  accumulation, mediated by MCU and modulated by NCLX, is thus required for normal glucose sensing by pancreatic  $\beta$ -cells, and becomes defective in conditions mimicking the diabetic milieu.

**Citation:** Tarasov AI, Semplici F, Ravier MA, Bellomo EA, Pullen TJ, et al. (2012) The Mitochondrial  $\text{Ca}^{2+}$  Uniporter MCU Is Essential for Glucose-Induced ATP Increases in Pancreatic  $\beta$ -Cells. PLoS ONE 7(7): e39722. doi:10.1371/journal.pone.0039722

**Editor:** Valdur Saks, Université Joseph Fourier, France

**Received:** February 27, 2012; **Accepted:** May 25, 2012; **Published:** July 19, 2012

**Copyright:** © 2012 Tarasov et al. This is an open-access article distributed under the terms of the Creative Commons Attribution License, which permits unrestricted use, distribution, and reproduction in any medium, provided the original author and source are credited.

**Funding:** Supported by the Wellcome Trust (Programme Grant 081958/Z/07/Z to GAR, Value in People (VIP) award to TJP) and the JDRF (Postdoctoral Fellowship to AIT), Telethon-Italy, Italian Association for Cancer Research, the Italian Ministry of Education (PRIN, FIRB), the Cariparo Foundation and the European Research Council ("mitoCalcium") (for RR). PG is Research Director of the Fonds National de la Recherche Scientifique, Brussels. MAR is Chargé de Recherches from INSERM, Paris. GAR is a Wellcome Trust Senior Investigator (WT098424AIA) and the holder of a Royal Society Wolfson Research Merit Award. The funders had no role in study design, data collection and analysis, decision to publish, or preparation of the manuscript.

**Competing Interests:** The authors have declared that no competing interests exist.

\* E-mail: g.rutter@imperial.ac.uk

## Introduction

Glucose-induced insulin secretion from pancreatic  $\beta$ -cells is essential to ensure the normal control of blood glucose concentrations [1]. Defects in  $\beta$ -cell glucose sensitivity [2,3] as well as a decrease in  $\beta$ -cell mass [4] are cardinal aspects of type 2 diabetes mellitus (T2D). A key event in glucose-induced insulin release is the stimulation of mitochondrial oxidative metabolism [5,6]. Enhanced ATP synthesis [7] results in the closure of ATP-sensitive  $\text{K}^+$  ( $\text{K}_{\text{ATP}}$ ) channels [8], membrane depolarisation and  $\text{Ca}^{2+}$  influx via voltage-gated  $\text{Ca}^{2+}$  channels, which triggers insulin release [1,9].

In most mammalian cells, mitochondrial oxidative metabolism is thought to be stimulated by  $\text{Ca}^{2+}$  [10,11] through the activation of intramitochondrial dehydrogenases [12]. This stimulates the supply of reducing equivalents to the respiratory chain [13], and hence ATP synthesis [14]. The above process is thought also to be important in pancreatic  $\beta$ -cells [15] and recent analyses using a mitochondrial  $\text{Ca}^{2+}$  buffer [14] have suggested that mitochondrial  $\text{Ca}^{2+}$  accumulation is important for sustained insulin secretion.

The interplay between cytosolic  $\text{Ca}^{2+}$ , mitochondrial  $\text{Ca}^{2+}$  and ATP synthesis has nonetheless remained enigmatic in the  $\beta$ -cell. In particular,  $\text{Ca}^{2+}$  entry into the cytosol, triggered by elevated ATP, is expected to enhance ATP hydrolysis, for example by activating granule exocytosis [16] and  $\text{Ca}^{2+}$  ATPases which pump the cation out of the cytosol [17]. The  $\text{Ca}^{2+}$ -induced drop in ATP is then predicted to open  $\text{K}_{\text{ATP}}$  channels, thereby arresting  $\text{Ca}^{2+}$  influx [18]. In addition,  $\text{Ca}^{2+}$  has been suggested to induce repolarisation of the plasma membrane by opening  $\text{Ca}^{2+}$ -activated  $\text{K}^+$  channels [19] or depolarising the mitochondrial inner membrane, which decreases the driving force for ATP synthesis by the  $\text{F}_1\text{F}_0$  ATPase [20].

Until very recently, the molecular entities responsible for catalysing mitochondrial  $\text{Ca}^{2+}$  uptake have remained unclear in any mammalian cell type. However, two reports in 2011 identified a  $\text{Ca}^{2+}$ -selective mitochondrial uniporter, MCU, encoded by the *Ccdc109a* gene [21,22], in a complex with a  $\text{Ca}^{2+}$  sensing subunit MICU1 [23], as the likely  $\text{Ca}^{2+}$  transporting entity. Conversely, mitochondrial  $\text{Ca}^{2+}$  efflux was proposed to be mediated by the  $\text{Na}^+$ - $\text{Ca}^{2+}$  exchanger NCLX [24]. Whether these transporters

catalyse mitochondrial Ca<sup>2+</sup> transport in the  $\beta$ -cell, and may thus modulate insulin secretion, is currently unknown.

In the present study, we have sought to explore (a) the molecular mechanisms responsible for Ca<sup>2+</sup> transfer across the mitochondrial membrane in  $\beta$ -cells and (b) the impact of these changes on cytosolic ATP dynamics and electrical excitability. To these ends, we have deployed a recently-developed, molecularly-addressed GFP-based recombinant probe for mitochondrial Ca<sup>2+</sup> ([Ca<sup>2+</sup>]<sub>mit</sub>), 2mt8RP [25], alongside a trappable cytosolic Ca<sup>2+</sup> probe (Fura Red) allowing us to image [Ca<sup>2+</sup>]<sub>cyt</sub> simultaneously with [Ca<sup>2+</sup>]<sub>mit</sub> in individual primary mouse  $\beta$ -cells. These measurements have been combined with perforated patch electrophysiology to allow plasma membrane potential ( $V_m$ ) to be recorded or controlled without perturbing cellular composition or metabolism [26]. Critically, this approach permits the ready and rapid control of [Ca<sup>2+</sup>]<sub>cyt</sub> via voltage-gated Ca<sup>2+</sup> channels [27] and thus an analysis of the interplay between [Ca<sup>2+</sup>]<sub>cyt</sub> and [Ca<sup>2+</sup>]<sub>mit</sub> in real time. In parallel, the novel ATP sensor *Perceval* [28], based on the bacterial regulatory protein, GlnK1, has been used to monitor the cytosolic ATP/ADP ratio ([ATP/ADP]<sub>cyt</sub>). These combined approaches have allowed us to characterise the roles of MCU and NCLX as regulators of mitochondrial ATP synthesis in the  $\beta$ -cell.

## Results

### Glucose induces a monophasic increase in cytosolic Ca<sup>2+</sup> but a biphasic increase in cytosolic ATP/ADP ratio

We sought first to determine whether increases in [Ca<sup>2+</sup>]<sub>cyt</sub> and/or [Ca<sup>2+</sup>]<sub>mit</sub> might influence glucose-induced increases in [ATP/ADP]<sub>cyt</sub>. The latter parameter was therefore imaged in single mouse  $\beta$ -cells expressing the GFP-based probe *Perceval* [28], which was chiefly localised to the cytosol as expected (Suppl. Fig. S1A). Changes measured with this probe were shown to be unrelated to small alterations in cytosolic pH, and thus largely to reflect [ATP/ADP]<sub>cyt</sub> (Suppl. Fig. S2A). [Ca<sup>2+</sup>]<sub>cyt</sub> was imaged simultaneously in the same cell using the trappable cytosolic/nuclear probe Fura-Red (Suppl. Fig. S1A) whilst  $V_m$  was monitored using patch-clamp in current-clamp mode [3].

$\beta$ -Cells maintained at low (3 mM) glucose exhibited a resting  $V_m$  of  $-68 \pm 1$  mV ( $n = 30$ , from 12 separate islet preparations; point *i* in Fig. 1A). An increase in glucose concentration to 17 mM led to a rapid elevation in [ATP/ADP]<sub>cyt</sub> (Fig. 1A, point *ii*) and an increase in input resistance, followed by depolarisation of the plasma membrane and a [Ca<sup>2+</sup>]<sub>cyt</sub> rise, as expected. This was closely followed by a drop in [ATP/ADP]<sub>cyt</sub> (Fig. 1A, *iii*). The  $33 \pm 4\%$  drop (“trough” in Fig. 1B) was, however, transient and [ATP/ADP]<sub>cyt</sub> quickly recovered and displayed a steady further increase (Fig. 1A, *iv*). The increase was not associated with any significant decrease in [Ca<sup>2+</sup>]<sub>cyt</sub>, and thus was not likely to reflect a lowering demand for Ca<sup>2+</sup> extrusion or other ATP-consuming processes. Furthermore, setting  $V_m$  to  $-70$  mV via the patch pipette, thus closing voltage-gated Ca<sup>2+</sup> channels, led to a prompt decrease in [Ca<sup>2+</sup>]<sub>cyt</sub> (Fig. 1A, *v*). The application of the mitochondrial uncoupler carbonyl cyanide 4-(trifluoromethoxy)phenylhydrazone (FCCP) resulted in an abrupt decrease of [ATP/ADP]<sub>cyt</sub>, as expected (Fig. 1A, *vi*), and an elevation of [Ca<sup>2+</sup>]<sub>cyt</sub>, presumably due to a compromise in Ca<sup>2+</sup> pumping across the plasma and ER membranes.

Combining data from multiple experiments ( $n = 30$  single cells, Fig. 1B) we were able to observe that high glucose induced an [ATP/ADP]<sub>cyt</sub> elevation in  $\beta$ -cells in two distinct phases (Fig. 1B). A rapid first phase preceded membrane depolarisation and electrical activity, whilst a slower second phase resulted in a larger increase of [ATP/ADP]<sub>cyt</sub> (Fig. 1B). These changes contrasted

with the essentially monophasic (albeit oscillatory) increases in [Ca<sup>2+</sup>]<sub>cyt</sub> (Fig. 1A).

### Cytosolic Ca<sup>2+</sup> influx is essential for the second phase of cytosolic ATP/ADP ratio increase

To dissect the dependence of the observed ATP increases on cytosolic Ca<sup>2+</sup> increases prompted by depolarisation in response to glucose, we measured the changes in [ATP/ADP]<sub>cyt</sub> in response to the sugar while keeping the cell hyperpolarised ( $V_m = -70$  mV) using the patch pipette in voltage-clamp mode (as in point *v*, Fig. 1A). This prevented extracellular Ca<sup>2+</sup> from entering the cytosol even at high extracellular glucose.

An increase in glucose from 3 mM to 17 mM resulted in a rapid elevation of [ATP/ADP]<sub>cyt</sub>, followed by a saturation of the [ATP/ADP]<sub>cyt</sub> level (*ii*, Fig. 2). Notably, in the absence of Ca<sup>2+</sup> influx, neither a trough, nor an increase in [ATP/ADP]<sub>cyt</sub> (see e.g. points *iii* and *iv* in Fig. 1A) were observed, suggesting that Ca<sup>2+</sup> influx is involved in the latter changes. To test this possibility, we imposed forced changes in [Ca<sup>2+</sup>]<sub>cyt</sub> with a train of 10 depolarisations (as given in Suppl. Fig. S2B) and then setting  $V_m$  back to  $-70$  mV (as indicated in the  $V_m$  trace in Fig. 2). The depolarisations triggered rapid and transient [Ca<sup>2+</sup>]<sub>cyt</sub> elevation which, in turn, resulted in a transient drop in [ATP/ADP]<sub>cyt</sub> (*iii*, Fig. 2). Remarkably, [ATP/ADP]<sub>cyt</sub> started recovering while the depolarisation train was still being applied, at high [Ca<sup>2+</sup>]<sub>cyt</sub>, and this trend continued after  $V_m$  had been re-set to  $-70$  mV and [Ca<sup>2+</sup>]<sub>cyt</sub> had decreased (*iv*, Fig. 2). These experiments indicate that the biphasic behaviour of [ATP/ADP]<sub>cyt</sub> response to glucose is caused by the increase in [Ca<sup>2+</sup>]<sub>cyt</sub> which results in a transient drop in [ATP/ADP]<sub>cyt</sub> followed by its recovery. The two phases of the glucose-induced increase in [ATP/ADP]<sub>cyt</sub> can therefore be classified as Ca<sup>2+</sup>-independent (the one that precedes) and Ca<sup>2+</sup>-dependent (the one that follows) Ca<sup>2+</sup> entry.

We next sought to determine whether the apparent increases in cytosolic ATP/ADP ratio reported with *Perceval* were associated with the closure of ATP-sensitive K<sup>+</sup> channels, as expected. This seemed an important question since fluctuations in “global” cytosolic ATP/ADP differ in some circumstances from those immediately beneath the plasma membrane, as recorded with a targeted luciferase-based probe [7]. The electrophysiological configuration used here allowed us to address this point as follows.

While keeping the cell hyperpolarised, at  $-70$  mV (Fig. 2), we applied small pulses between  $-65$  and  $-80$  mV, to monitor slow whole-cell current,  $I_m$ . These pulses were too small to trigger any voltage-gated Ca<sup>2+</sup> conductance and therefore had no effect on Ca<sup>2+</sup> entry. The addition of 17 mM glucose decreased  $I_m$  during the Ca<sup>2+</sup>-independent phase of [ATP/ADP]<sub>cyt</sub> increase (Fig. 2, inset), most likely due to the inhibition of K<sub>ATP</sub> channels, the main providers of the  $\beta$ -cell conductance ( $G_m$ ) [29].  $G_m$  thus was found to decrease from the initial value of  $0.43 \pm 0.09$  nS/pF to  $0.09 \pm 0.02$  nS/pF ( $n = 12$ ) during the Ca<sup>2+</sup>-independent phase. A strong and significant correlation (Pearson's  $r = -0.84 \pm 0.05$ ,  $p < 0.05$ ,  $n = 12$ ) between the elevation of [ATP/ADP]<sub>cyt</sub> as recorded with *Perceval*, and the closure of K<sub>ATP</sub> changes as measured above, (Suppl. Fig. S2C) indicated that the optical measurements with the GFP-based probe provided a useful guide to [ATP/ADP]<sub>cyt</sub> changes in the physiologically-relevant domain beneath the plasma membrane. Interestingly, half-maximal inhibition of  $G_m$  coincided with the increase of [ATP/ADP]<sub>cyt</sub> of  $20 \pm 8\%$  ( $n = 12$ , Suppl. Fig. S2C), while earlier data [29] suggest that half-maximal  $G_m$  is likely to be reached at around  $28 \pm 4\%$  of the [ATP/ADP]<sub>cyt</sub> increase. Thus, the increase in [ATP/ADP]<sub>cyt</sub> was reported with a  $32 \pm 21$  s delay after the drop in  $G_m$  measured using patch-clamp. This small delay may reflect

A

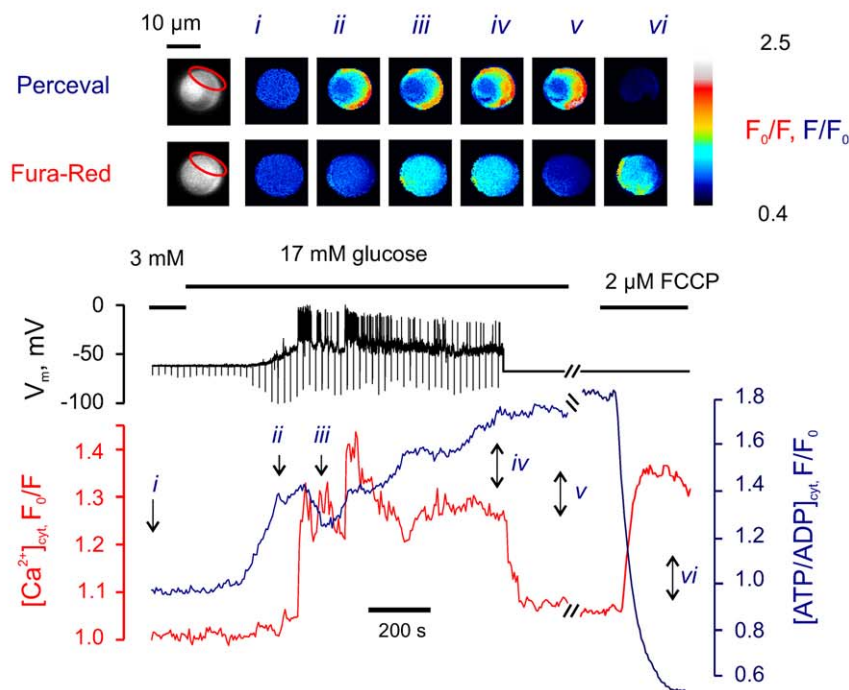

B

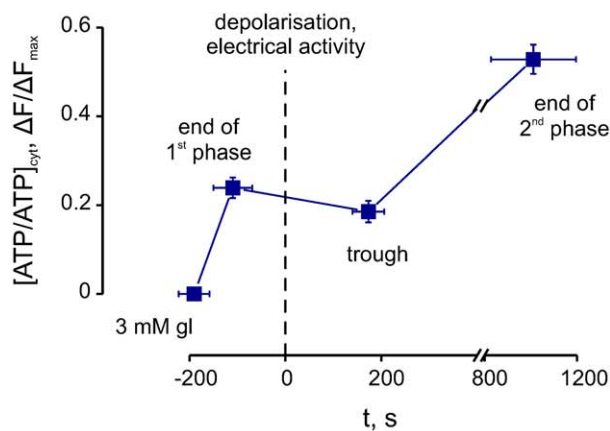

**Figure 1. Glucose induces a biphasic increase in cytosolic ATP/ADP ratio.** **A:** The effects of high (17mM) glucose on  $[ATP/ADP]_{cyt}$  (reported with *Perceval*),  $[Ca^{2+}]_{cyt}$  (Fura-Red) and  $V_m$  were measured in a single  $\beta$ -cell (representative of  $n=30$  cells). The voltage down-strokes were elicited by 10 ms 10 pA current injections applied every 20 s to monitor the input resistance which increased upon the elevation of  $[ATP/ADP]_{cyt}$ . **Inset:** Pseudo-colour images of the patched cell cluster presenting pixel-to-pixel ratios at the time points indicated by arrows (i–vi). ROI is indicated with red oval. Note that a cell expressing high levels of *Perceval* (just below the ROI) was deliberately excluded from analysis. **B:** Characteristic times and amplitudes of glucose-induced  $[ATP/ADP]_{cyt}$  increase in  $\beta$ -cells (Fig. 1A;  $n=30$ ). The data were normalised to the width of the range of  $[ATP/ADP]_{cyt}$  change ( $\Delta F_{max}$ ), measured as the difference in *Perceval* fluorescence between the peak point at 17 mM glucose and the point corresponding to application of 2  $\mu$ M FCCP. Depolarisation and onset of electrical activity was taken as zero of the time axis. The change in  $[ATP/ADP]_{cyt}$  ( $\Delta F/\Delta F_{max}$ ) at each point is significant vs every other point ( $p<0.01$ , Wilcoxon's paired test). doi:10.1371/journal.pone.0039722.g001

the propagation of the glucose-induced ATP increase from the sub-membrane compartment to the bulk cytosol [7,30].

#### Glucose induces a sequential increase in $[Ca^{2+}]_{cyt}$ and $[Ca^{2+}]_{mit}$

We next explored the possibility that the uptake of  $Ca^{2+}$  by mitochondria may be related to the second phase of  $[ATP/ADP]_{cyt}$  increase, as suggested by earlier experiments in  $\beta$ -cell populations [14]. To explore the temporal relationship between

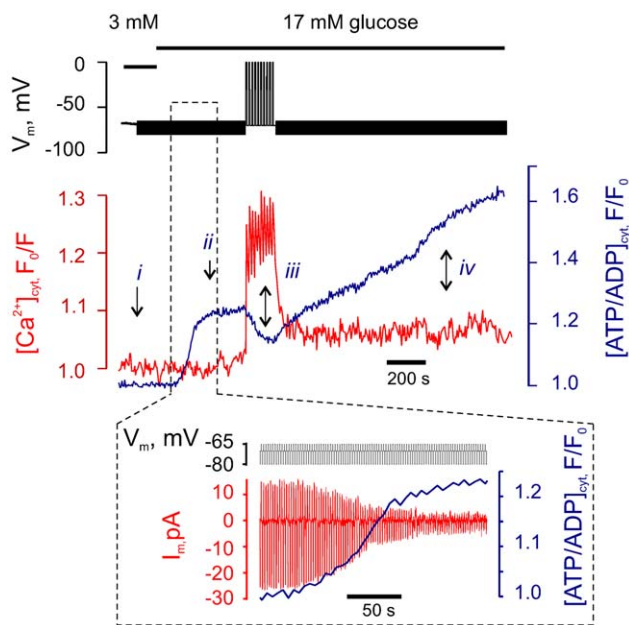

**Figure 2. Ca<sup>2+</sup> entry into the cytosol is essential for the biphasic increase of cytosolic ATP/ADP.** The effect of high glucose on [ATP/ADP]<sub>cyt</sub> and [Ca<sup>2+</sup>]<sub>cyt</sub> was measured in a single  $\beta$ -cell voltage-clamped at  $-70$  mV (representative of  $n=12$  cells). Small voltage steps ( $+5/-10$  mV) were applied every second to measure the slow whole-cell current,  $I_m$ . **Inset** dynamics of [ATP/ADP]<sub>cyt</sub> and  $I_m$  during the indicated range corresponding to the first stage of ATP elevation. doi:10.1371/journal.pone.0039722.g002

increases in [Ca<sup>2+</sup>]<sub>cyt</sub> and [Ca<sup>2+</sup>]<sub>mit</sub> in single  $\beta$ -cells after stimulation with glucose, we used a mitochondrial matrix-targeted fluorescent Ca<sup>2+</sup> probe, 2mt8RP [25] (Fig. 3A; Supp. Fig. S1B). At 3 mM glucose, the plasma membrane was hyperpolarised as expected ( $V_m = -68 \pm 1$  mV,  $n = 22$ ) and [Ca<sup>2+</sup>]<sub>cyt</sub> and [Ca<sup>2+</sup>]<sub>mit</sub> were stable (Fig. 3B, point *i*). Exposure to 17 mM glucose led to an increase in [Ca<sup>2+</sup>]<sub>cyt</sub> (Fig. 3B, *ii*) which was followed later by an increase in [Ca<sup>2+</sup>]<sub>mit</sub>, presumably reflecting Ca<sup>2+</sup> uniporter-mediated uptake (Fig. 3B, *iii*). [Ca<sup>2+</sup>]<sub>cyt</sub> and [Ca<sup>2+</sup>]<sub>mit</sub> reached their maximal amplitudes  $47 \pm 6$  s and  $134 \pm 25$  s, respectively, after the onset of glucose-induced electrical activity (Fig. 3C).

### MCU mediates mitochondrial Ca<sup>2+</sup> increases and the second phase of glucose-induced [ATP/ADP]<sub>cyt</sub> increases

In experiments using an identical configuration to those above, the maximal rate of [ATP/ADP]<sub>cyt</sub> decrease was observed  $106 \pm 22$  s after the first action potential (between points *ii* and *iii* in Fig. 1A). This observation, and those described for the time course of mitochondrial Ca<sup>2+</sup> increases (Fig. 3B, C), are thus consistent with the possibility that mitochondrial Ca<sup>2+</sup> accumulation (and hence an activation of oxidative metabolism) plays a role in the regulation of the [ATP/ADP]<sub>cyt</sub> increase that follows an initial and small Ca<sup>2+</sup>-induced drop. To test this possibility directly we therefore reduced the expression of the recently-identified mitochondrial Ca<sup>2+</sup> uniporter, MCU [21,22], in  $\beta$ -cells by  $>80\%$  (as assessed by qRT-PCR, not shown) using a lentivirally-delivered shRNA (Fig. 4). Silencing of MCU caused a substantial impairment of apparent Ca<sup>2+</sup> entry into mitochondria, whilst the imposed cytosolic Ca<sup>2+</sup> increases were unaffected (Fig. 4A, B). Importantly, this manipulation also resulted in an alteration of the glucose-induced [ATP/ADP]<sub>cyt</sub> changes (Fig. 5A, B). Thus, MCU silencing had no effect on the first phase of the glucose-induced

[ATP/ADP]<sub>cyt</sub> increase, the rise of [Ca<sup>2+</sup>]<sub>cyt</sub> or subsequent electrical spiking (Fig. 5A). However, the second (Ca<sup>2+</sup>-dependent) phase of the [ATP/ADP]<sub>cyt</sub> increase, i.e. the [ATP/ADP]<sub>cyt</sub> recovery, was significantly impaired in the  $\beta$ -cells where MCU expression was reduced (Fig. 5A, B).

To determine whether MCU knock-down might affect mitochondrial membrane potential ( $\Psi_m$ ) independently of a Ca<sup>2+</sup> increase, we explored the glucose-induced changes in this parameter prior to [Ca<sup>2+</sup>]<sub>cyt</sub> elevation using tetramethyl rhodamine, ethyl ester (TMRE). The resting  $\Psi_m$  (measured as  $-127 \pm 4$  mV in control *vs*  $-133 \pm 5$  mV in MCU<sup>-</sup> cells) and the kinetics of the glucose-induced change (Fig. 5C) were not affected by the knock-down of MCU.

### NCLX modulates mitochondrial Ca<sup>2+</sup> changes

Pharmacological inhibition of mitochondrial Na<sup>+</sup>-Ca<sup>2+</sup> exchange has been reported to elevate the basal ATP levels in INS-1 cells and primary rat islets [31]. However, the agent used (CGP37157) was likely to affect cellular Ca<sup>2+</sup> homeostasis by targeting plasma membrane voltage-gated Ca<sup>2+</sup> channels, as reported by Luciani *et al* [32]. NCLX was recently identified as an essential component of the mitochondrial Na<sup>+</sup>-Ca<sup>2+</sup> exchanger [24], responsible for Ca<sup>2+</sup> efflux from mitochondria, thereby providing an opportunity for a specific inhibition of Ca<sup>2+</sup> efflux from mitochondria through RNA interference. In the present study, silencing of NCLX significantly potentiated depolarisation-induced increases in [Ca<sup>2+</sup>]<sub>mit</sub> (Fig. 6A, B). NCLX silencing also slightly accelerated the onset of the first phase of the [ATP/ADP]<sub>cyt</sub> response to glucose (Fig. 6C, D), but had no significant effect on the amplitude of the [ATP/ADP]<sub>cyt</sub> changes (Fig. 6C, E).

### Chronic glucolipotoxicity inhibits mitochondrial Ca<sup>2+</sup> increases and delays [ATP/ADP]<sub>cyt</sub> recovery

Previous studies [33] have indicated that the structure and localisation of mitochondria are altered in  $\beta$ -cell dysfunction, including glucolipotoxicity, i.e. exposure to high levels of free fatty acids (FFA) and glucose. Importantly, glucose-induced ATP increases in the  $\beta$ -cell are impaired in this model of T2D [34]. We therefore sought to determine whether these changes were also associated with defective mitochondrial Ca<sup>2+</sup> increases or altered expression of mitochondrial Ca<sup>2+</sup> transporters.

To this end, we cultured primary mouse  $\beta$ -cells under glucolipotoxic conditions ("FFA<sup>+</sup>" cells) and studied the impact on the dynamics of [Ca<sup>2+</sup>]<sub>cyt</sub> and [Ca<sup>2+</sup>]<sub>mit</sub> in response to  $V_m$  manipulation. FFA<sup>+</sup> cells displayed slower dynamics of [Ca<sup>2+</sup>]<sub>mit</sub> increase (Fig. 7A, B). This resulted in a slower onset of the second phase of glucose-induced ATP increase (Fig. 8A, B) in FFA<sup>+</sup>  $\beta$ -cells. This effect was not likely to be caused by changes in resting  $\Psi_m$  ( $-135 \pm 4$  mV in control *vs*  $-137 \pm 4$  mV in FFA<sup>+</sup> cells) or the kinetics of the glucose-induced change in  $\Psi_m$  (Fig. 8C). We also failed to observe any significant change of either MCU or NCLX mRNA levels under these conditions (Fig. 8D). The expression of the transcription factor pancreatic duodenum homeobox-1 (Pdx1), in contrast, was significantly reduced by the chronic glucolipotoxicity, in line with earlier observations [35].

## Discussion

### Multiparametric analysis of glucose signalling in single primary $\beta$ -cells

We dissect here the role of mitochondrial Ca<sup>2+</sup> transport in the stimulation of single primary pancreatic  $\beta$ -cells with glucose using a combined imaging and electrophysiology approach. This has allowed us to monitor or manipulate up to four key parameters

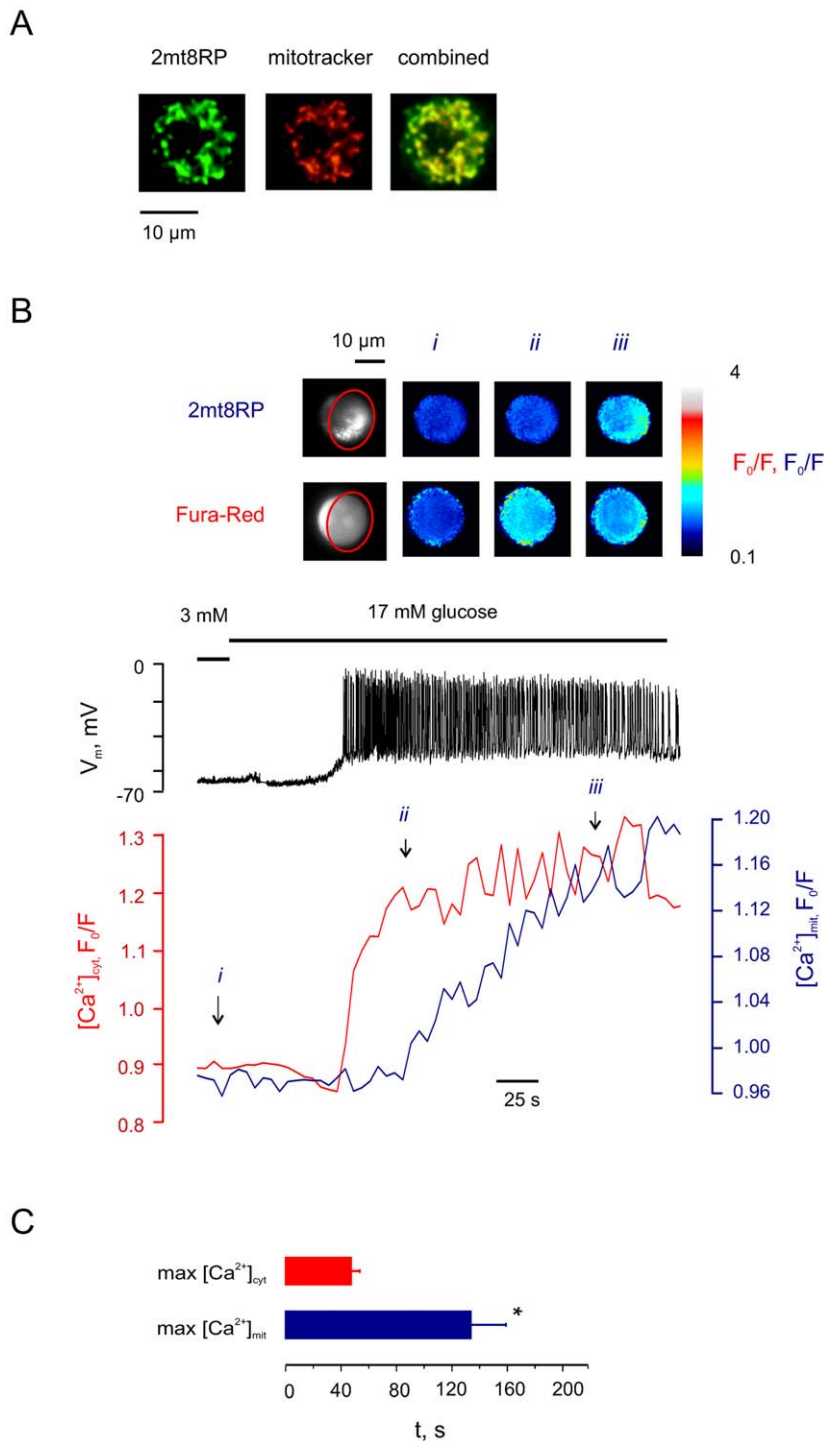

**Figure 3. Mitochondrial  $[Ca^{2+}]$  follows the increase in cytosolic  $[Ca^{2+}]$  with a delay.** **A:** Colocalisation of 2mt8RP and Mitotracker Orange in a  $\beta$ -cell, 24 h post infection. **B:** The effect of 17 mM glucose on  $V_m$ ,  $[Ca^{2+}]_{cyt}$  (Fura-Red) and  $[Ca^{2+}]_{mit}$  (2mt8RP) in a single pancreatic  $\beta$ -cell (representative of  $n = 10$  cells). **Inset:** Pseudo-colour images of the patched cell cluster presenting pixel-to-pixel ratios at the time points indicated by arrows (*i* – *iii*). ROI is indicated with red oval. **C:** Mean times of maximal increase for  $[Ca^{2+}]_{cyt}$  and  $[Ca^{2+}]_{mit}$  in pancreatic  $\beta$ -cells, in response to 17 mM glucose ( $n = 10$  cells). The times are calculated from the moment of the arrival of the first action potential. \*Differences are statistically significant ( $p < 0.01$ ).

doi:10.1371/journal.pone.0039722.g003

simultaneously in the same individual cell. Earlier studies in these cells combined the use of a microelectrode [36] or patch-clamp [37] with  $[Ca^{2+}]$  measurements to report a close association of  $[Ca^{2+}]_{cyt}$  and  $V_m$  signals during glucose-induced depolarisation.

Furthermore, the control of  $V_m$  using perforated-patch was shown to be a very efficient means of rapid and precise control of  $[Ca^{2+}]_{cyt}$  [19,38]. The latter strategy provided a powerful tool here to explore the inter-relationships between  $Ca^{2+}$  changes in discrete

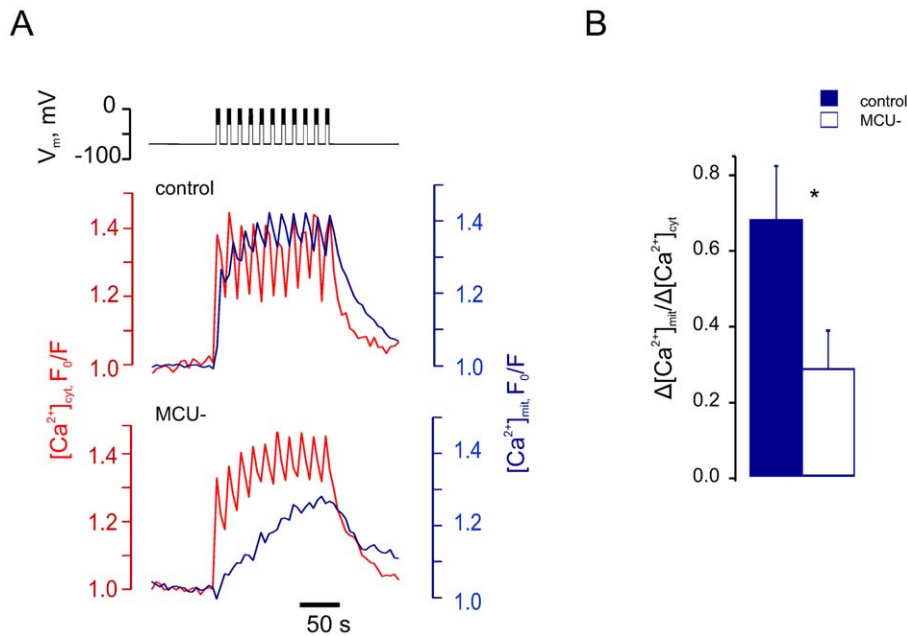

**Figure 4. MCU silencing impairs mitochondrial Ca<sup>2+</sup> increases.** Pancreatic  $\beta$ -cells were infected with lentiviruses encoding nonsense ("control") or anti-MCU ("MCU<sup>-</sup>") shRNA for 72 h. **A:** [Ca<sup>2+</sup>]<sub>cyt</sub> (Fura-Red) and [Ca<sup>2+</sup>]<sub>mit</sub> (2mt8RP) increases were measured in response to 10 depolarising bursts, applied at 4 min<sup>-1</sup> by patch pipette (representative traces for n = 12, control, and n = 10, MCU<sup>-</sup> cells). **B:** Mean ratios of maximal increases in [Ca<sup>2+</sup>]<sub>mit</sub> to the respective increases in [Ca<sup>2+</sup>]<sub>cyt</sub> ( $\Delta[Ca^{2+}]_{mit}/\Delta[Ca^{2+}]_{cyt}$ ) measured in control and MCU<sup>-</sup>  $\beta$ -cells. doi:10.1371/journal.pone.0039722.g004

compartments and with the control of ATP synthesis. Thus, a key technical advantage over earlier studies [14] has been the ability to resolve the exact sequence in which signalling events occurred within the same individual cell. Moreover, possible artefacts resulting from the progressive recruitment of cells within a population were also excluded.

These studies also represent the first use of the novel ATP/ADP probe *Perceval* [28] in an excitable cell, and provide significant advances over the previous use of less sensitive luciferase-based reporters [7,39]. Although the affinity of *Perceval* for ATP is relatively high, competition with ADP lowers its sensitivity to a range appropriate for the  $\beta$ -cell cytosol (~1 mM ATP at 3 mM glucose) [7,29]. Importantly, pH changes appeared not to interfere with the probe (Suppl. Fig. S2A).

### MCU mediates mitochondrial Ca<sup>2+</sup> uptake and enhanced ATP synthesis in pancreatic $\beta$ -cells

We demonstrate here firstly that both cytosolic and mitochondrial Ca<sup>2+</sup> increases are essential for the sustained (second) phase of [ATP/ADP]<sub>cyt</sub> increase in response to high glucose. Interestingly, we show (Fig. 2) that a transient imposed increase in [Ca<sup>2+</sup>]<sub>cyt</sub> is sufficient to lead to a progressive and sustained increase in [ATP/ADP]<sub>cyt</sub>. This finding is consistent with the possibility that mitochondrial uptake of Ca<sup>2+</sup> in response to high glucose (which is slow compared to increases in cytosolic Ca<sup>2+</sup>; Fig. 3B, C) may then allow a sustained activation (i.e. "plasticity" or "memory") of oxidative metabolism [39,40].

Recent studies [21,22], have provided convincing evidence for a role of MCU in mitochondrial transport in mammalian fibroblasts. However, no evidence currently exists demonstrating a role for this protein in this process in a more differentiated cell type. We report here firstly that MCU is critical for mitochondrial Ca<sup>2+</sup> accumulation in pancreatic  $\beta$ -cells in response to depolarisation-induced Ca<sup>2+</sup> increases. Likewise, we show that the Na<sup>+</sup>-Ca<sup>2+</sup>

exchanger NCLX [24] regulates [Ca<sup>2+</sup>]<sub>mit</sub> increases and may thus be involved in regulating the responses to glucose, consistent with earlier findings using the pharmacological inhibitor CGP37157 [31]. Specifically, NCLX silencing affected the kinetics of the glucose-induced ATP/ADP changes but had no significant effect on the steady-state ATP/ADP level. Although the mechanisms underlying this unexpected observation are presently unclear, they may involve glucose-dependent changes in cytosolic [Na<sup>+</sup>] (unpublished observation of I.S.). Future studies are required to address this question and the role of NCLX in the  $\beta$ -cell.

Overall, our data support a two-phase model (Fig. 9), in which an initial increase in cytosolic [ATP/ADP] (first phase) occurs independently of any increase in cytosolic (or mitochondrial) Ca<sup>2+</sup> concentration. In the second phase, the elevation of cytosolic Ca<sup>2+</sup> concentration leads to a gradual increase in mitochondrial Ca<sup>2+</sup> (Fig. 3B). This, in turn, is likely to activate intramitochondrial dehydrogenases [10] (and perhaps other mitochondrial enzymes) [41], stimulating respiratory chain activity and hence mitochondrial ATP production. In line with this view, the initial rapid glucose-induced increase in [ATP/ADP]<sub>cyt</sub> (first phase) was not affected by the MCU silencing whereas the second phase of [ATP/ADP]<sub>cyt</sub> increase was essentially eliminated.

A recent study [14] also described biphasic increases in cytosolic ATP/ADP in  $\beta$ -cell populations in response to glucose, and indicated that mitochondrial Ca<sup>2+</sup> accumulation may be essential for increases in cytosolic ATP/ADP in response to the sugar. However, this earlier study relied on the over-expression in the mitochondrial matrix of a high affinity (and high capacity) calcium-binding protein, S100G. Whether the presence of this protein within the mitochondrial matrix may interfere with normal mitochondrial function (for example by leading to a decrease in mitochondrial pH as a result of Ca<sup>2+</sup> binding) is unclear.

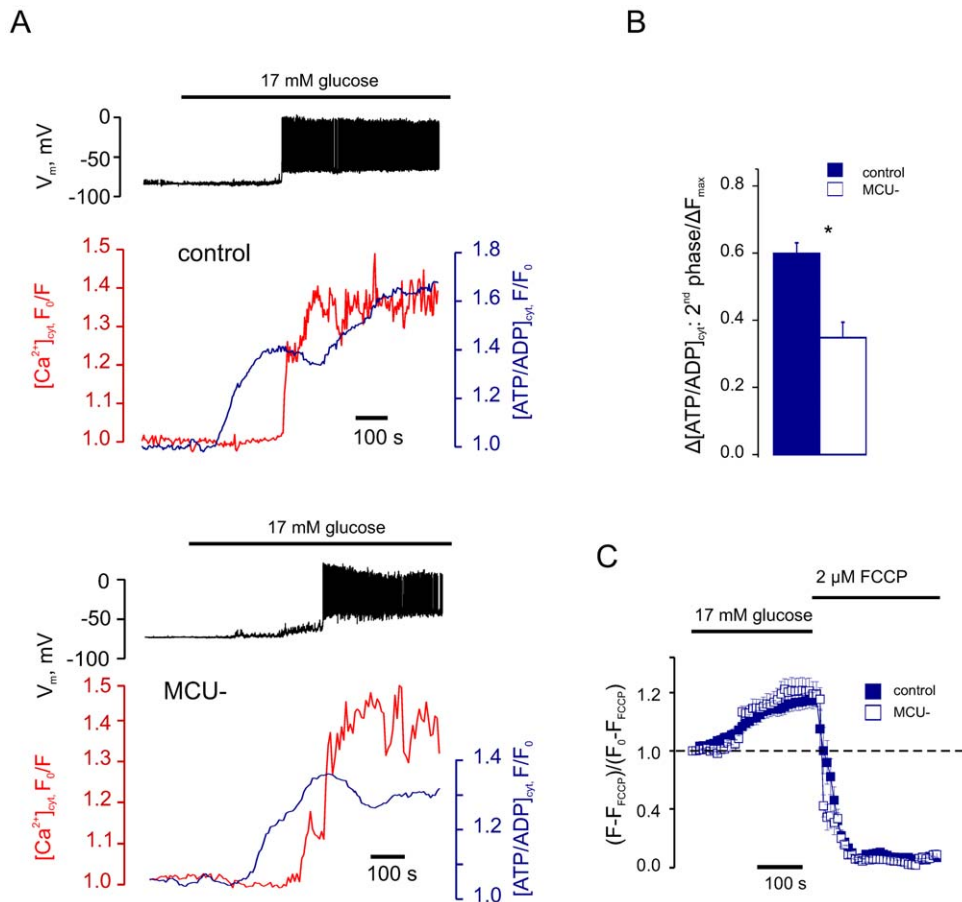

**Figure 5. MCU silencing impairs the Ca<sup>2+</sup>-dependent phase of glucose-induced ATP increase.** *A:* Glucose-induced changes in  $V_m$ ,  $[\text{Ca}^{2+}]_{\text{cyt}}$  and  $[\text{ATP}/\text{ADP}]_{\text{cyt}}$  were measured in current clamp, using Fura-Red and *Perceval*, respectively (representative for  $n = 8$ , control, and  $n = 10$ , MCU<sup>-</sup> cells). *B:* Mean magnitudes of the second phase of  $[\text{ATP}/\text{ADP}]_{\text{cyt}}$  increase measured in control and MCU<sup>-</sup>  $\beta$ -cells. The data were normalised to the width of the range of  $[\text{ATP}/\text{ADP}]_{\text{cyt}}$  change ( $\Delta F_{\text{max}}$ ), measured as the difference in *Perceval* fluorescence between the peak point at 17 mM glucose and the point corresponding to application of 2  $\mu\text{M}$  FCCP. *C:* Changes in  $\Delta\Psi_m$  measured as mitochondrial TMRE fluorescence, in response to the increase of glucose from 3 to 17 mM, in control and MCU<sup>-</sup>  $\beta$ -cells. The data are expressed as  $(F - F_{\text{FCCP}})/(F_0 - F_{\text{FCCP}})$ , where  $F_0$  and  $F_{\text{FCCP}}$  represent TMRE fluorescence intensity in 3 mM glucose and 2  $\mu\text{M}$  FCCP, respectively. \*Differences are statistically significant,  $p < 0.01$ . doi:10.1371/journal.pone.0039722.g005

### A role for MCU in the regulation of $\beta$ -cell excitability and insulin secretion?

Mitochondrial Ca<sup>2+</sup> accumulation, catalysed by MCU, is revealed here to be essential for the second phase of glucose-induced ATP synthesis by glucose. What may be the consequences for electrical activity and insulin secretion? Increases in ATP are believed to be involved in both “K<sub>ATP</sub>-dependent” and “K<sub>ATP</sub>-independent” regulation of exocytosis by glucose [16,42]. Importantly, we obtained no evidence for a role for mitochondrial Ca<sup>2+</sup> accumulation in the regulation of plasma membrane electrical activity (Fig. 5) suggesting that an involvement of mitochondrial Ca<sup>2+</sup> in the regulation of insulin secretion, as implied by earlier studies [14], is likely to involve the latter (K<sub>ATP</sub>-independent) action on secretory granule movement or fusion, perhaps powered by ATP increases [43]. Further studies, using larger cell populations, will be necessary to explore the impact of MCU on phasic insulin secretion.

### A role for mitochondrial Ca<sup>2+</sup> transport in $\beta$ -cell glucolipotoxicity?

We show here that glucolipotoxic conditions impair Ca<sup>2+</sup> transport into mitochondria (Fig. 7) and the second phase of

glucose-induced ATP/ADP increases (Fig. 8). The expression of both MCU and NCLX was unaltered under these conditions (Fig. 8D), in line with previous studies in models of diet-induced  $\beta$ -cell dysfunction in rodents [44]. It is therefore likely that changes in the intracellular distribution of mitochondria induced by the diabetic milieu [33] are involved in this impairment in mitochondrial Ca<sup>2+</sup> transport. These changes in mitochondrial architecture, and hence localisation at sites of Ca<sup>2+</sup> entry into the cytosol [45], may consequently interfere with mitochondrial Ca<sup>2+</sup> transport and ATP production.

### Conclusions

We show here that mitochondrial Ca<sup>2+</sup> uptake in the excitable  $\beta$ -cell is mediated by MCU and modulated by NCLX. Changes in Ca<sup>2+</sup> in the mitochondrial matrix are shown to be critical for increases in cytosolic ATP/ADP ratio, and may thus be required for glucose-stimulated insulin secretion [14]. Manipulation of MCU activity, in particular, may thus provide potential strategies to improve defective insulin secretion in some forms of diabetes.

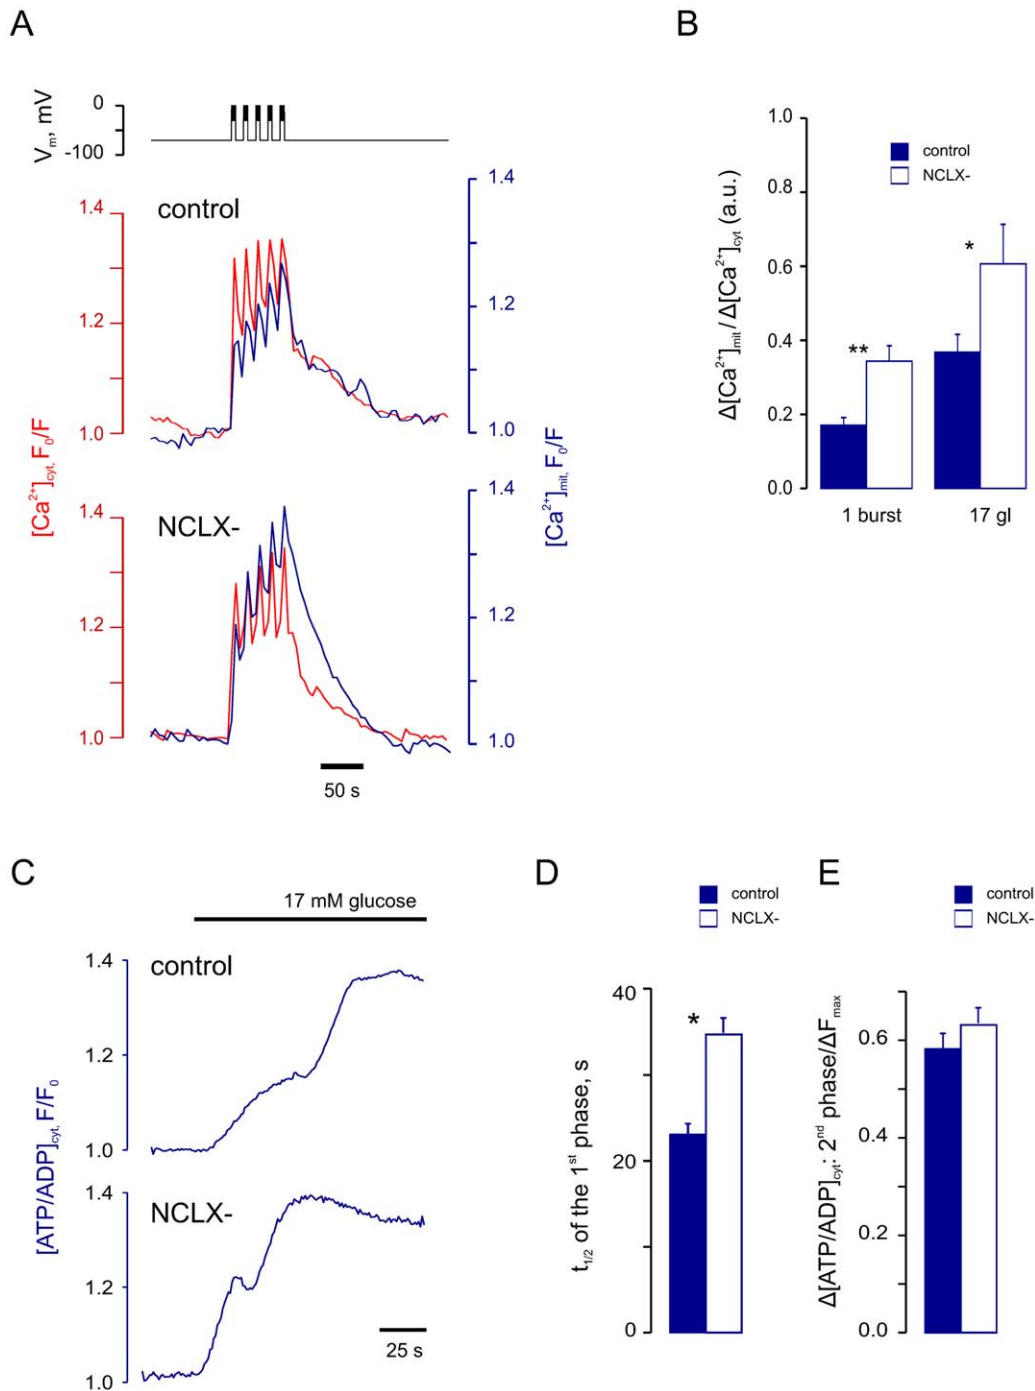

**Figure 6. Effect of the NCLX silencing on  $[Ca^{2+}]_{cyt}$  and  $[Ca^{2+}]_{mit}$  dynamics.** Pancreatic  $\beta$ -cells were infected with lentiviruses delivering nonsense shRNA ("control") or shRNA against NCLX ("NCLX<sup>-</sup>") for 36–48 h. **A:**  $[Ca^{2+}]_{cyt}$  and  $[Ca^{2+}]_{mit}$  increases in response to 5 depolarising bursts applied at 4 min<sup>-1</sup> were measured using Fura-Red and 2mt8RP, respectively. **B:** Mean increases in  $[Ca^{2+}]_{mit}$  induced by a single depolarising burst or by exposure to 17 mM glucose, related to the respective increases in  $[Ca^{2+}]_{cyt}$  ( $\Delta[Ca^{2+}]_{mit}/\Delta[Ca^{2+}]_{cyt}$ ). **C:** Glucose-induced changes in  $[ATP/ADP]_{cyt}$  were measured using Perceval (representative for n = 9 control and n = 9 NCLX<sup>-</sup> cells). **D:** Times of half-maximal increase in  $[ATP/ADP]_{cyt}$  in response to 17 mM glucose, in control and NCLX<sup>-</sup> cells. **E:** Mean magnitudes of the second phase of  $[ATP/ADP]_{cyt}$  increase measured in control and NCLX<sup>-</sup>  $\beta$ -cells. The data were normalised to the width of the range of  $[ATP/ADP]_{cyt}$  change ( $\Delta F_{max}$ ), measured as the difference in *Perceval* fluorescence between the peak point at 17 mM glucose and the point corresponding to application of 2  $\mu$ M FCCP. Differences vs respective NCLX<sup>-</sup> data are significant with  $p < 0.05$  (\*) or  $p < 0.01$  (\*\*). doi:10.1371/journal.pone.0039722.g006



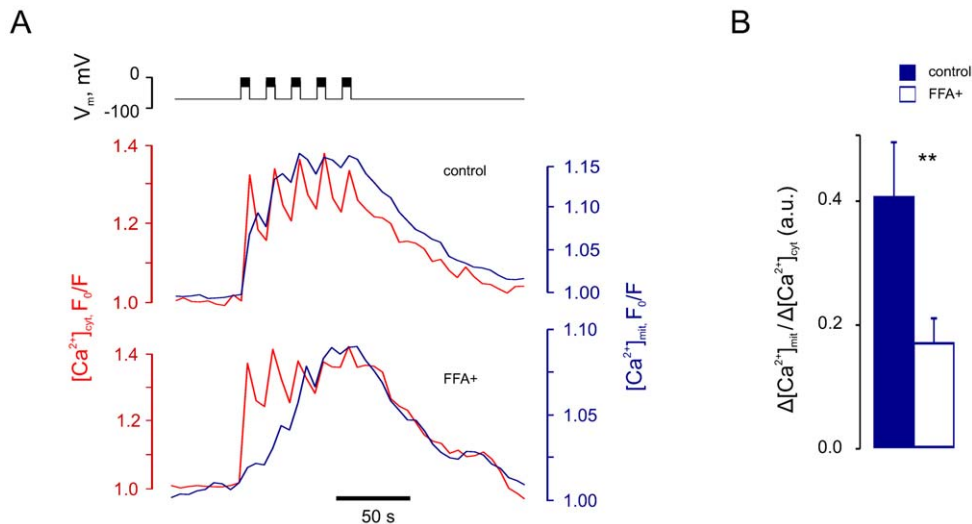

**Figure 7. Chronic exposure to high-glucose and high-FFA medium impairs Ca<sup>2+</sup> entry into mitochondria.**  $\beta$ -Cells were pre-cultured in FFA-free medium containing 11 mM glucose (“control”) or medium containing 17 mM glucose and 0.5 mM palmitate (“FFA+”) for 48–72 h. **A:** The cells were voltage-clamped at  $-70$  mV and five depolarising bursts were applied at  $4 \text{ min}^{-1}$ , as indicated in  $V_m$  trace (above).  $[Ca^{2+}]_{cyt}$  and  $[Ca^{2+}]_{mit}$  were monitored with Fura-Red and 2mt8RP, respectively. **B:** Peak  $[Ca^{2+}]_{mit}$  induced by a single burst related to the respective peak  $[Ca^{2+}]_{cyt}$  ( $\Delta[Ca^{2+}]_{mit}/\Delta[Ca^{2+}]_{cyt}$ ), measured in control (blue columns,  $n = 10$ ) and FFA+ (white columns,  $n = 9$ ) cells. \*Differences are significant with  $p < 0.05$  (\*) or  $p < 0.01$  (\*\*).

doi:10.1371/journal.pone.0039722.g007

## Materials and Methods

### Islet isolation and culture

Female CD1 mice were sacrificed by cervical dislocation as approved by the United Kingdom Home Office (HO) Animal Scientific Procedures Act, 1986 and designated as “Schedule 1” procedure. Animals were maintained under HO Licence PPL 70/7349 (Holder Dr I Leclerc), which received local ethical committee approval, and all participants received approved local training at Imperial College. Pancreatic islets were isolated by collagenase digestion [46], pre-cultured for 5 h in RMPI-1640 medium, containing 11 mM glucose, 10% FCS, 100 U penicillin, 100  $\mu$ g streptomycin, at  $37^\circ\text{C}$ , 5%  $\text{CO}_2$ , infected with an appropriate adenovirus encoding cDNA for the required probe, split into single  $\beta$ -cells and plated on glass coverslips. The cells were then cultured for  $>24$  h in absolute humidity for 2–4 days and assayed as described below. Glass-attached single cells or 2–3-cell clusters displayed an infection efficiency of  $\sim 90\%$ .  $\beta$ -Cells were identified morphologically and according to their electrophysiological characteristics (membrane capacitance,  $V_m$ ,  $K_{ATP}$  current, lack of  $\text{Na}^+$  current, response to glucose).

Chronic glucolipotoxicity was modelled by culturing the cells in medium containing 0.5 mM  $\text{Na}^+$ -palmitate and 17 mM glucose for 72 h. Palmitate was prepared as a 150 mM stock in ethanol; the working solution also contained 0.67% fatty-acid free BSA (Sigma). Control medium contained, respectively, 0.67% FFA-free BSA and 0.17% ethanol.

MCU was silenced in primary  $\beta$ -cells by 24h incubation with shRNA-bearing lentiviral particles (sc-142052-V, Santa-Cruz Biotechnology), at  $1 \times 10^6$  infectious units/ml. Cells infected with the GFP+ control particles (sc-108084) at the same titre displayed a multiplicity of infection of two, 36 hours after infection. Particles delivering non-target shRNA (sc-108080) were used as a negative control.

### Molecular biology and generation of adenoviruses

cDNA encoding Perceval [28] was excised from pGW1CMV-Perceval plasmid (kindly provided by Prof Gary Yellen, Yale University) by restriction first with *EcoRI*, then extension using T4 DNA-polymerase and finally by restriction with *HindIII* to liberate the insert. The *HindIII*/blunt insert was cloned into pShuttleCMV previously digested with *EcoRV* and *HindIII*.

cDNA encoding 2mt8-ratiometric pericam (2mt8RP) was kindly provided by Prof Tullio Pozzan (University of Padua). “Mt8” refers to the first 36 amino acids of subunit VIII of human cytochrome *c* oxidase (COX) while the targeting efficiency was improved by using two tandem repeats of the addressing sequence [25]. Adenoviral particles were produced as in [47].

### Gene expression measurement by qRT-PCR

RNA was purified from islet samples using Trizol. RNA was quantified by Nanodrop spectrophotometer then reverse transcribed using a High Capacity cDNA Reverse Transcription kit (Applied Biosystems). mRNA abundance was quantified by qPCR using Sybr Green PCR Master Mix (Applied Biosystems) on a 7500 Fast Real-time PCR machine. Expression of each gene was normalised to cyclophilin A (*Ppia*), and FFA treatment effect as fold change with 95% confidence intervals was calculated using the  $\Delta\Delta C_T$  method on 7500 Software (Applied Biosystems, v2.0.5).

### Single cell epifluorescence imaging

Simultaneous imaging of  $[Ca^{2+}]$  in mitochondria and the cytosol was performed using the mitochondrial pericam 2mt8RP, and Fura-Red (Invitrogen) respectively. 2mt8RP, Fura-Red and Indo-1 were used at single excitation and emission wavelengths. Either dye was dissolved in DMSO (4mM) containing 4% F127-Pluronic. Cells were loaded with Fura-Red by incubation with  $4 \mu\text{M}$  of the dye in the extracellular solution for 30 min. Imaging experiments were performed on an Olympus IX-71 microscope with UPlanFL N  $\times 40$  magnification objective. For acquisition, an F-View-II camera and MT-20 excitation system equipped with a

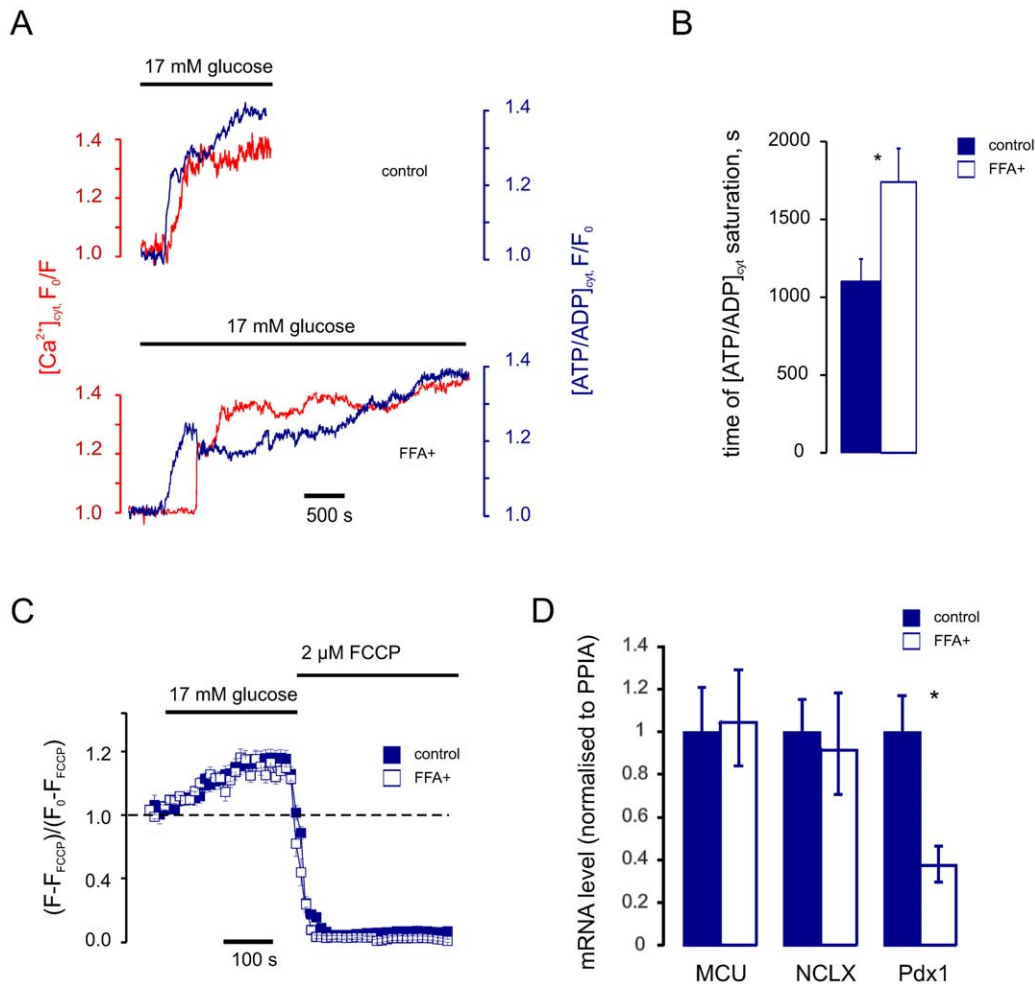

**Figure 8. Chronic glucolipotoxicity slows down the second phase of glucose-induced ATP elevation.** *A*: Glucose-induced changes in  $[ATP/ADP]_{cyt}$  and  $[Ca^{2+}]_{cyt}$  were monitored in control (above) and FFA<sup>+</sup> (below) cells using Perceval and Fura-Red. *B*: Mean time of saturation of the second phase of  $[ATP/ADP]_{cyt}$  increase in control (blue columns,  $n=16$ ) and FFA<sup>+</sup> (white columns,  $n=13$ ) cells. *C*: Changes in  $\Delta\Psi_m$  measured as mitochondrial TMRE fluorescence, in response to the increase of glucose from 3 to 17 mM, in control and FFA<sup>+</sup>  $\beta$ -cells. The data are expressed as  $(F-F_{FCCP})/(F_0-F_{FCCP})$ , where  $F_0$  and  $F_{FCCP}$  represent TMRE fluorescence intensity in 3 mM glucose and 2  $\mu$ M FCCP, respectively. *D*: Normalised MCU (*Ccdc109a*), NCLX (*Slc24a6*) and Pdx1 (*Pdx1*) mRNA expression levels for control and FFA<sup>+</sup> cells. \*Differences are significant ( $p<0.05$ ). doi:10.1371/journal.pone.0039722.g008

Hg/Xe arc lamp were used, under control of CellR software (Olympus). Excitation/emission wavelengths were (nm): 410/535 (2mt8RP), 490/630 (Fura-Red), 490/535 (Perceval). Images were acquired at a frequency of 0.2 Hz with typical excitation times of 10 ms. The acquisition of the fluorescence and electrophysiological data was synchronized using TTL pulses. Imaging data was background-subtracted, analysed and presented as  $F/F_0$  (Perceval) and  $F_0/F$  (Fura-Red, 2mt8RP). Whole cells were selected as regions of interest (ROI) to minimize the effect of the cell drift. For cell clusters, only the patched cell was included in the ROI. Every  $[Ca^{2+}]$  recording was subjected to the dynamic range control by applying, at the end of the trace, solutions containing 10  $\mu$ M ionomycin: “Ca<sup>2+</sup>-free” (0.5 mM EGTA), “Ca<sup>2+</sup>-max” (5 mM Ca<sup>2+</sup>). For the  $[ATP/ADP]_{cyt}$  recordings the dynamic range was controlled by high glucose (maximum after >30 min of exposure) and 2  $\mu$ M carbonyl cyanide 4-(trifluoromethoxy)phenylhydrazone (FCCP; minimum).

### Measurements of TMRE fluorescence

Cells were loaded with 7 nM TMRE for 60min at 3 mM glucose. Confocal imaging was performed in bath solution (see below) initially containing 3mM glucose, using a Zeiss microscope fitted with a Plan Apochromat x63 n. a. 1.4 oil immersion objective and equipped with Yokogawa CSU22 spinning disk module. The TMRE fluorescence signal was excited at 563 nm using a solid-state laser. Emission at 600 nm was registered using Hamamatsu ImagEM EM-CCD camera. The calculations of  $\Psi_m$  were done on the basis of the ratio of mitochondrial and cytosolic fluorescence, as was outlined in [48].

### Electrophysiology

Electrophysiological recordings and stimulation were done in whole-cell perforated-patch configuration, using an EPC9 patch-clamp amplifier controlled by Pulse acquisition software (HEKA Elektronik). The pipette tip was dipped into pipette solution, and then back-filled with the same solution containing 0.17 mg/ml amphotericin B. Series resistance and cell capacitance were compensated automatically by the acquisition software. Record-

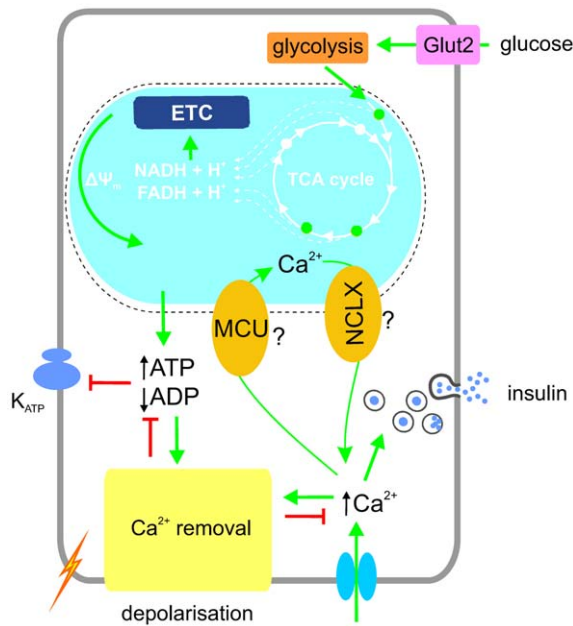

**Figure 9. Proposed scheme of interplay between Ca<sup>2+</sup>, ATP and V<sub>m</sub> in the  $\beta$ -cell.** The oxidation of glucose that enters the  $\beta$ -cell hyperpolarises the mitochondrial membrane ( $\Delta\Psi_m$ ) thereby leading to the elevation of cytosolic ATP/ADP ratio, closing of K<sub>ATP</sub> channels, depolarisation of the plasma membrane (V<sub>m</sub>) and Ca<sup>2+</sup> entry. Elevated cytosolic [Ca<sup>2+</sup>] triggers a number of ATP-dependent processes including insulin secretion and Ca<sup>2+</sup> removal into the ER and extracellular medium. By entering mitochondria via MCU, Ca<sup>2+</sup> potentiates oxidative metabolism to counter-balance ATP expenditure. Ca<sup>2+</sup> exits mitochondria via NCLX.  
doi:10.1371/journal.pone.0039722.g009

ings, triggered by the TTL pulse, were started in current-clamp mode, and the depolarization of the plasma membrane was monitored simultaneously with [Ca<sup>2+</sup>]<sub>cyt</sub> and [ATP/ADP]<sub>cyt</sub>, in response to a glucose step from 3 to 17 mM. To monitor the input resistance, the protocol included 10-ms injections of repolarising 10-pA current applied every 20s. The parameters of the current injections were chosen to minimise their effect on the glucose-induced electrical activity. To control V<sub>m</sub> and impose electrical stimulations, the mode was periodically switched to voltage-clamp [49]. V<sub>m</sub> was held at the value of -70 mV, with 0.5 Hz +5/-10 mV pulses to monitor the K<sub>ATP</sub> conductance (see Suppl. Fig. S2B). The electrical stimulation was deemed to mimic the naturally occurring bursts of action potentials and comprised of 5-s depolarization trains to -30 mV containing 25 ramps of 100 ms to 0 mV and back (Suppl. Fig. S2B). Data were filtered at 1 kHz, and digitised at 2 kHz. G<sub>m</sub> was normalized to cell capacitance to account for cell size.

## References

- Rutter GA (2004) Visualising Insulin Secretion. The Minkowski lecture 2004. *Diabetologia* 47: 1861–1872.
- Mari A, Tura A, Natali A, Laville M, Laakso M, et al. (2010) Impaired beta cell glucose sensitivity rather than inadequate compensation for insulin resistance is the dominant defect in glucose intolerance. *Diabetologia* 53: 749–756.
- Tarasov AI, Nicolson T, Riveline JP, Taneja TK, Baldwin SA, et al. (2008) A rare mutation in ABC8/SUR1 leading to altered KATP channel activity and {beta}-cell glucose sensing is associated with type 2 diabetes mellitus in adults. *Diabetes* 57: 1595–1604.
- Butler AE, Janson J, Bonner-Weir S, Ritzel R, Rizza RA, et al. (2003) Beta-cell deficit and increased beta-cell apoptosis in humans with type 2 diabetes. *Diabetes* 52: 102–110.
- Maechler P, Wollheim CB (2001) Mitochondrial function in normal and diabetic beta-cells. *Nature* 414: 807–812.
- Rutter GA (2001) Nutrient-secretion coupling in the pancreatic islet b-cell: Recent advances. *Molecular Aspects of Medicine* 22: 247–284.
- Kennedy HJ, Pouli AE, Ainscow EK, Jouaville LS, Rizzuto R, et al. (1999) Glucose generates sub-plasma membrane ATP microdomains in single islet beta-cells. Potential role for strategically located mitochondria. *J Biol Chem* 274.
- Ashcroft FM, Harrison DE, Ashcroft SJH (1984) Glucose induces closure of single potassium channels in isolated rat pancreatic B-cells. *Nature Lond* 312: 446–448.
- Wollheim CB, Sharp GW (1981) Regulation of insulin release by calcium. *Physiol Rev* 61: 914–973.

## Experimental solutions

The pipette solution contained (mM): 76 K<sub>2</sub>SO<sub>4</sub>, 10 NaCl, 10 KCl, 1 MgCl<sub>2</sub>, 5 HEPES (pH7.35 with KOH). The extracellular bath solution, referred in text as “EC” contained (mM): 120 NaCl, 4.8 KCl, 24 NaHCO<sub>3</sub> (saturated with CO<sub>2</sub>), 0.5 Na<sub>2</sub>HPO<sub>4</sub>, 5 HEPES (pH 7.4 with NaOH), 2.5 CaCl<sub>2</sub>, 1.2 MgCl<sub>2</sub>. All experiments were conducted at 32–33°C and the bath solution was perfused continuously.

## Data analysis

Imaging data was analysed using CellR (Olympus) and ImageJ (Wayne Rasband, NIMH). The simultaneous recordings were combined together and analysed using Igor Pro (Wavemetrics). The results are presented as mean ± SEM. Mann-Whitney U-test and Wilcoxon’s paired test were used to assess the statistical significance of the differences between the independent and dependent samples, respectively.

## Supporting Information

### Figure S1 Expression patterns of Perceval and 2mt8RP.

**A:** A two-cell pancreatic  $\beta$ -cell cluster was infected with Perceval (48 h,  $\lambda_{ex}$  = 490 nm,  $\lambda_{em}$  = 535 nm) and incubated with Fura-Red (30 min,  $\lambda_{ex}$  = 490 nm,  $\lambda_{em}$  = 630 nm). **B:** A three-cell pancreatic  $\beta$ -cell cluster was infected with 2mt8RP (48 h,  $\lambda_{ex}$  = 490 nm,  $\lambda_{em}$  = 535 nm) and loaded with Fura-Red (30 min,  $\lambda_{ex}$  = 490 nm,  $\lambda_{em}$  = 630 nm). (TIF)

### Figure S2 Imaging ATP dynamics in single $\beta$ -cells.

**Effects of pH, analysis of kinetics.** **A:** Comparison of the effects of glucose and pH on the Perceval fluorescence. 17 mM glucose was applied to the cell, followed by 140 mM K<sup>+</sup> plus 10  $\mu$ M nigericin solutions of the indicated pH. **B:** Schematic of the depolarisation protocol (single burst). **C:** The first phase of glucose-induced [ATP/ADP]<sub>cyt</sub> increase and the decrease in G<sub>m</sub> were closely associated in time. G<sub>m</sub> was calculated from I<sub>m</sub> traces (Fig. 2B, inset). The pairs of signals (n = 12) were normalised by the range of change during the first phase of ATP elevation. (TIF)

## Acknowledgments

We thank Profs. G Yellen (Yale), R.M Denton and P.J. Cullen (Bristol) for useful discussion.

## Author Contributions

Conceived and designed the experiments: GAR AIT. Performed the experiments: AIT FS MAR EAB TJP. Analyzed the data: AIT GAR. Contributed reagents/materials/analysis tools: PG RR IS. Wrote the paper: AIT GAR. Proofread the manuscript: TJP.

10. McCormack JG, Halestrap AP, Denton RM (1990) Role of calcium ions in regulation of mammalian intramitochondrial metabolism. *Physiol Rev* 70: 391–425.
11. Hajnoczky G, Robb-Gaspers LD, Seitz MB, Thomas AP (1995) Decoding of cytosolic calcium oscillations in the mitochondria. *Cell* 82: 415–424. 0092-8674(95)90430-1 [pii].
12. Rutter GA (1990) Ca<sup>2+</sup>-binding to citrate cycle enzymes. *Int J Biochem* 22: 1081–1088.
13. Pralong WF, Bartley C, Wollheim CB (1990) Single islet beta-cell stimulation by nutrients: relationship between pyridine nucleotides, cytosolic Ca<sup>2+</sup> and secretion. *EMBO J* 9: 53–60.
14. Wiederkehr A, Szanda G, Akhmedov D, Matakic C, Heizmann CW, et al. (2011) Mitochondrial matrix calcium is an activating signal for hormone secretion. *Cell Metab* 13: 601–611.
15. Rutter GA, Theler JM, Murgia M, Wollheim CB, Pozzan T, et al. (1993) Stimulated Ca<sup>2+</sup> influx raises mitochondrial free Ca<sup>2+</sup> to supramicromolar levels in a pancreatic beta-cell line. Possible role in glucose and agonist-induced insulin secretion. *J Biol Chem* 268: 22385–22390.
16. Eliasson L, Renstrom E, Ding WG, Proks P, Rorsman P (1997) Rapid ATP-dependent priming of secretory granules precedes Ca<sup>2+</sup>-induced exocytosis in mouse pancreatic B-cells. *J Physiol London* 503: 399–412.
17. Ainscow EK, Rutter GA (2002) Glucose-stimulated oscillations in free cytosolic ATP concentration imaged in single islet  $\beta$  cells: evidence for a Ca<sup>2+</sup>-dependent mechanism. *Diabetes* 51: S162–S170.
18. Detimary P, Gilon P, Henquin JC (1998) Interplay between cytoplasmic Ca<sup>2+</sup> and the ATP/ADP ratio: a feedback control mechanism in mouse pancreatic islets. *Biochem J* 333: 269–274.
19. Gopel SO, Kanno T, Barg S, Eliasson L, Galvanovskis J, et al. (1999) Activation of Ca(2+)-dependent K(+) channels contributes to rhythmic firing of action potentials in mouse pancreatic beta cells. *J Gen Physiol* 114: 759–770.
20. Nguyen KT, Garcia-Chacon LE, Barrett JN, Barrett EF, David G (2009) The Psi(m) depolarization that accompanies mitochondrial Ca<sup>2+</sup> uptake is greater in mutant SOD1 than in wild-type mouse motor terminals. *Proc Natl Acad Sci U S A* 106: 2007–2011.
21. De Stefani D, Raffaello A, Teardo E, Szabo I, Rizzuto R (2011) A forty-kilodalton protein of the inner membrane is the mitochondrial calcium uniporter. *Nature* 476: 336–340.
22. Baughman JM, Perocchi F, Girgis HS, Plovanich M, Belcher-Timme CA, et al. (2011) Integrative genomics identifies MCU as an essential component of the mitochondrial calcium uniporter. *Nature* 476: 341–345.
23. Perocchi F, Gohil VM, Girgis HS, Bao XR, McCombs JE, et al. (2010) MICU1 encodes a mitochondrial EF hand protein required for Ca(2+) uptake. *Nature* 467: 291–296.
24. Palty R, Silverman WF, Hershinkel M, Caporale T, Sensi SL, et al. (2010) NCLX is an essential component of mitochondrial Na<sup>+</sup>/Ca<sup>2+</sup> exchange. *Proc Natl Acad Sci U S A* 107: 436–441.
25. Filippin L, Abad MC, Gastaldello S, Magalhaes PJ, Sandona D, et al. (2005) Improved strategies for the delivery of GFP-based Ca<sup>2+</sup> sensors into the mitochondrial matrix. *Cell Calcium* 37: 129–136.
26. Horn R, Korn SJ (1992) Prevention of rundown in electrophysiological recording. *Methods Enzymol* 207:149–55.
27. Eliasson L, Renstrom E, Ammala C, Berggren PO, Bertorello AM, et al. (1996) PKC-dependent stimulation of exocytosis by sulfonylureas in pancreatic beta cells. *Science* 271: 813–815.
28. Berg J, Hung YP, Yellen G (2009) A genetically encoded fluorescent reporter of ATP: ADP ratio. *Nat Methods* 6: 161–166.
29. Tarasov AI, Girard CA, Ashcroft FM (2006) ATP sensitivity of the ATP-sensitive K<sup>+</sup> channel in intact and permeabilized pancreatic beta-cells. *Diabetes* 55: 2446–2454.
30. Park MK, Ashby MC, Erdemli G, Petersen OH, Tepikin AV (2001) Perinuclear, perigranular and sub-plasmalemmal mitochondria have distinct functions in the regulation of cellular calcium transport. *EMBO J* 20: 1863–1874. 10.1093/emboj/20.8.1863 [doi].
31. Lee B, Miles PD, Vargas L, Luan P, Glasco S, et al. (2003) Inhibition of mitochondrial Na<sup>+</sup>-Ca<sup>2+</sup> exchanger increases mitochondrial metabolism and potentiates glucose-stimulated insulin secretion in rat pancreatic islets. *Diabetes* 52: 965–973.
32. Luciani DS, Misler S, Polonsky KS (2006) Ca<sup>2+</sup> controls slow NAD(P)H oscillations in glucose-stimulated mouse pancreatic islets. *J Physiol* 572: 379–392.
33. Molina AJ, Wikstrom JD, Stiles L, Las G, Mohamed H, et al (2009) Mitochondrial networking protects beta-cells from nutrient-induced apoptosis. *Diabetes* 58: 2303–2315.
34. Kohnke R, Mei J, Park M, York DA, Erlanson-Albertsson C (2007) Fatty acids and glucose in high concentration down-regulates ATP synthase beta-subunit protein expression in INS-1 cells. *Nutr Neurosci* 10: 273–278.
35. Gremlich S, Bonny C, Waeber G, Thorens B (1997) Fatty acids decrease IDX-1 expression in rat pancreatic islets and reduce GLUT2, glucokinase, insulin, and somatostatin levels. *J Biol Chem* 272: 30261–30269.
36. Gilon P, Henquin JC (1992) Influence of membrane potential changes on cytoplasmic Ca<sup>2+</sup> concentration in an electrically excitable cell, the insulin-secreting pancreatic B-cell. *J Biol Chem* 267: 20713–20720.
37. Chow RH, Lund PE, Loser S, Panten U, Gylfe E (1995) Coincidence of early glucose-induced depolarization with lowering of cytoplasmic Ca<sup>2+</sup> in mouse pancreatic beta-cells. *J Physiol* 485 (Pt 3): 607–617.
38. Gilon P, Arredouani A, Gailly P, Gromada J, Henquin JC (1999) Uptake and release of Ca<sup>2+</sup> by the endoplasmic reticulum contribute to the oscillations of the cytosolic Ca<sup>2+</sup> concentration triggered by Ca<sup>2+</sup> influx in the electrically excitable pancreatic B-cell. *J Biol Chem* 274: 20197–20205.
39. Jouaville LS, Pinton P, Bastianutto C, Rutter GA, Rizzuto R (1999) Regulation of mitochondrial ATP synthesis by calcium: evidence for a long-term metabolic priming. *Proc Natl Acad Sci U S A* 96: 13807–13812.
40. Ainscow EK, Rutter GA (2001) Mitochondrial priming modifies Ca<sup>2+</sup> oscillations and insulin secretion in pancreatic islets. *Biochem J* 353: 175–180.
41. Harris DA, Das AM (1991) Control of mitochondrial ATP synthesis in the heart. *Biochem J* 280: 561–573.
42. Takahashi N, Kadowaki T, Yazaki Y, Ellis-Davies GC, Miyashita Y, et al. (1999) Post-priming actions of ATP on Ca<sup>2+</sup>-dependent exocytosis in pancreatic beta cells. *Proc Natl Acad Sci U S A* 96: 760–765.
43. Tsuboi T, da Silva Xavier, G, Leclerc I, Rutter GA (2003) 5'-AMP-activated protein kinase controls insulin-containing secretory vesicle dynamics. *J Biol Chem* 278: 52042–52051.
44. Parton LE, McMillen PJ, Shen Y, Docherty E, Sharpe E, et al. (2006) Limited role for SREBP-1c in defective glucose-induced insulin secretion from Zucker diabetic fatty rat islets: a functional and gene profiling analysis. *Am J Physiol Endocrinol Metab* 291: E982–E994.
45. Rutter GA, Tsuboi T, Ravier MA (2006) Ca<sup>2+</sup> microdomains and the control of insulin secretion. *Cell Calcium* 40: 539–551.
46. Ravier MA, Rutter GA (2005) Glucose or insulin, but not zinc ions, inhibit glucagon secretion from mouse pancreatic alpha-cells. *Diabetes* 54: 1789–1797.
47. Luo J, Deng ZL, Luo X, Tang N, Song WX, et al. (2007) A protocol for rapid generation of recombinant adenoviruses using the AdEasy system. *Nat Protoc* 2: 1236–1247.
48. Fink C, Morgan F, Loew LM (1998) Intracellular fluorescent probe concentrations by confocal microscopy. *Biophys J* 75: 1648–1658.
49. Tarasov AI, Welters HJ, Senkel S, Ryffel GU, Hattersley AT, et al. (2006) A Kir6.2 mutation causing neonatal diabetes impairs electrical activity and insulin secretion from INS-1 beta-cells. *Diabetes* 55: 3075–3082.
